# Supplementary material
Source: publisher figshare collection journal article supplement (https://asha.figshare.com/ndownloader/files/34076411)
Supplement: Supplementary file 1 [file 34076411]

## Sheet: ReadMe
Supplemental material, Storkel, "Minimal, Maximal, or Multiple: Which Contrastive Intervention Approach to Use With Children With Speech Sound Disorders?" LSHSS, https://doi.org/10.1044/2021_LSHSS-21-00105
Supplemental Material S8. Minimal pair selection spreadsheet for consonant-vowel-consonant real words and nonwords. Note that the spreadsheet has multiple worksheets/tabs.
Please cite this work as:
Storkel, H. L., (2022). Minimal, maximal, or multiple: Which contrastive intervention approach to use with different children with speech sound disorders? Language, Speech, and Hearing Services in Schools.
The minimal pairs were created using the supplemental materials provided in:
Storkel, H. L. (2013). A corpus of consonant-vowel-consonant real words and nonwords: Comparison of phonotactic probability, neighborhood density, and consonant age of acquisition. Behavior Research Methods, 45, 1159-1167.
Klatt_Transcription describes how the CVCs are transcribed.
Minimal Pairs shows all possible minimal pairs that contrast target sounds in initial position. "Ng" (as in king) is excluded because it does not occur in initial position)
The CVCs from the source material (Storkel, 2013) are aligned by rhyme. These are listed in the rows.
The CVCs are coded as words (green) or nonwords (orange) based on coding in the source material (i.e., whether they were found in adult or child corpora)
Not that some legal CVCs were not in the source material. This likely occurred because certain CVCs were eliminated based on their density and/or phonotactic probabilities. Refer to Storkel (2013) for details. This shouldn't impact your use of this spreadsheet to identify stimuli for treatment. The missing CVCs are not likely to create many real words given their density and phonotactic probabili…
The minimal pair worksheet is currently sorted by C2 dev (alphabetical -- early-8, late-8, mid-8) and then by the number of real words for each rhyme (high to low).
You can filter the MinimalPairs worksheet by the color of the cells for a particular sound or sounds to help you identify real words or nonwords for specific targets.
For example, if you are looking for real words for voiceless th and r, go to the th column, click the down arrow, select filter by color, select green. Go the r column, click the down arrow, select filter by color, select green. You know have real words for voiceless th and r (i.e., 11 options).
To unfliter the MinimalPairs, go to the data tab and pick clear in the sort & filter area.
Note that although a CVC might be coded as a real word, it may not be a frequently used real word or one that is child appropriate so you'll need to read the stimuli to decide if they will work for you or not.

## Sheet: Klatt_Transcription
Correspondence between International Phonetic Alphabet (IPA) and Klatt Phonemic Trasncription (used in this supplement)
Sound Class		IPA	Klatt	Description
Nasals**		m	m
		m̩	M	Note: capital m syllabic m
		n	n
		n̩	N	Note: capital n syllabic n
		ŋ	G	Note: capital g
Glides		w	w
		j	y
		h	h
Liquids**		l	l
		l̩	L	Note: capital l syllabic l
		r	r
		ɝ	R	Note: capital r stressed "er" e.g. turtle
		ɚ	X	Note: capital x unstressed "er" e.g., butter
Stops	Labial	p	p
		b	b
	Coronal	t	t
		d	d
	Dorsal	k	k
		g	g
Fricatives	Labial	f	f
		v	v
	Coronal	θ	T	Note: capital t
		ð	D	Note: capital d
		s	s
		z	z
		ʃ	S	Note: capital s
		Ʒ	Z	Note: capital z
Affricates		ʧ	C	Note: capital c
		ʤ	J
Sound Class		IPA	Klatt	Description
Vowels		i	i
		ɪ	I	Note: capital i
		e	e
		ɛ	E	Note: capital e
		ɝ	R	stressed "er" e.g. turtle
		ɑ	a
		ʌ	^
		ə	x
		ɚ	X	Note: capital x unstressed "er" e.g., butter
		u	u
		ʊ	U	Note: capital u
		o	o
		ɔ	c
		æ	@
		aʊ	W	Note: capital w
		aɪ	Y	Note: capital y
		ɔɪ	O	Note: capital o
Vowel +r***		ɑr	ar	"are"
		ɔr	cr	"horse"
		or	or	"hoarse"
		ær	@r	"mary"
		ɛr	Er	"merry"
		ɪr	Ir	"ear"
		ʊr	Ur	"tour"
		aɪr	Yr	"fire"
		aʊr	Wr	"hour"
See also http://www.people.ku.edu/~mvitevit/Klatt_IPA.pdf for additional symbols and transcription conventions
** Corpora makes liberal use of syllabic consonants where many others would transcribe schwa+consonant in word-final position
***re: vowel+r, some differences are subtle and may not be present in certain dialects of American English

## Sheet: MinimalPairs
VC2_Rhyme_Klatt	VC2_Rhyme_IPA	C2 Dev	p	b	t	d	k	g	f	v	θ	ð	s	z	ʃ	ʧ	ʤ	w	j	h	m	n	l	r	# of real words	Real Word	Nonword
en	eɪn	early-8	pen	ben	ten	den	ken	gen	fen	ven	Ten	Den	sen	zen	Sen	Cen	Jen	wen	yen	hen	men	nen	len	ren	15
En	ɛn	early-8	pEn	bEn	tEn	dEn	kEn	gEn	fEn	vEn	TEn	DEn	sEn	zEn	SEn	CEn	JEn	wEn	yEn	hEn	mEn	nEn	lEn	rEn	14
@m	æm	early-8	p@m	b@m	t@m	d@m	k@m	g@m	f@m	v@m	T@m	D@m	s@m	z@m	S@m	C@m	J@m	w@m	y@m	h@m	m@m	n@m	l@m	r@m	13
In	ɪn	early-8	pIn	bIn	tIn	dIn	kIn	gIn	fIn	vIn	TIn	DIn	sIn	zIn	SIn	CIn	JIn	wIn	yIn	hIn	mIn	nIn	lIn	rIn	13
ip	ip	early-8	pip	bip	tip	dip	kip	gip	fip	vip	Tip	Dip	sip	zip	Sip	Cip	Jip	wip	yip	hip	mip	nip	lip	rip	13
Ip	ɪp	early-8	pIp	bIp	tIp	dIp	kIp	gIp	fIp	vIp	TIp	DIp	sIp	zIp	SIp	CIp	JIp	wIp	yIp	hIp	mIp	nIp	lIp	rIp	13
on	oʊn	early-8	pon	bon	ton	don	kon	gon	fon	von	Ton	Don	son	zon	Son	Con	Jon	won	yon	hon	mon	non	lon	ron	13
Yn	aɪn	early-8	pYn	bYn	tYn	dYn	kYn	gYn	fYn	vYn	TYn	DYn	sYn	zYn	SYn	CYn	JYn	wYn	yYn	hYn	mYn	nYn	lYn	rYn	13
@d	æd	early-8	p@d	b@d	t@d	d@d	k@d	g@d	f@d	v@d	T@d	D@d	s@d	z@d	S@d	C@d	J@d	w@d	y@d	h@d	m@d	n@d	l@d	r@d	12
@n	æn	early-8	p@n	b@n	t@n	d@n	k@n	g@n	f@n	v@n	T@n	D@n	s@n	z@n	S@n	C@n	J@n	w@n	y@n	h@n	m@n	n@n	l@n	r@n	12
@p	æp	early-8	p@p	b@p	t@p	d@p	k@p	g@p	f@p	v@p	T@p	D@p	s@p	z@p	S@p	C@p	J@p	w@p	y@p	h@p	m@p	n@p	l@p	r@p	12
^m	ʌm	early-8	p^m	b^m	t^m	d^m	k^m	g^m	f^m	v^m	T^m	D^m	s^m	z^m	S^m	C^m	J^m	w^m	y^m	h^m	m^m	n^m	l^m	r^m	12
^n	ʌn	early-8	p^n	b^n	t^n	d^n	k^n	g^n	f^n	v^n	T^n	D^n	s^n	z^n	S^n	C^n	J^n	w^n	y^n	h^n	m^n	n^n	l^n	r^n	12
Ed	ɛd	early-8	pEd	bEd	tEd	dEd	kEd	gEd	fEd	vEd	TEd	DEd	sEd	zEd	SEd	CEd	JEd	wEd	yEd	hEd	mEd	nEd	lEd	rEd	12
ab	ɑb	early-8	pab	bab	tab	dab	kab	gab	fab	vab	Tab	Dab	sab	zab	Sab	Cab	Jab	wab	yab	hab	mab	nab	lab	rab	11
in	in	early-8	pin	bin	tin	din	kin	gin	fin	vin	Tin	Din	sin	zin	Sin	Cin	Jin	win	yin	hin	min	nin	lin	rin	11
ad	ɑd	early-8	pad	bad	tad	dad	kad	gad	fad	vad	Tad	Dad	sad	zad	Sad	Cad	Jad	wad	yad	had	mad	nad	lad	rad	10
ap	ɑp	early-8	pap	bap	tap	dap	kap	gap	fap	vap	Tap	Dap	sap	zap	Sap	Cap	Jap	wap	yap	hap	map	nap	lap	rap	10
em	eɪm	early-8	pem	bem	tem	dem	kem	gem	fem	vem	Tem	Dem	sem	zem	Sem	Cem	Jem	wem	yem	hem	mem	nem	lem	rem	10
id	id	early-8	pid	bid	tid	did	kid	gid	fid	vid	Tid	Did	sid	zid	Sid	Cid	Jid	wid	yid	hid	mid	nid	lid	rid	10
od	oʊd	early-8	pod	bod	tod	dod	kod	god	fod	vod	Tod	Dod	sod	zod	Sod	Cod	Jod	wod	yod	hod	mod	nod	lod	rod	10
un	un	early-8	pun	bun	tun	dun	kun	gun	fun	vun	Tun	Dun	sun	zun	Sun	Cun	Jun	wun	yun	hun	mun	nun	lun	run	10
^b	ʌb	early-8	p^b	b^b	t^b	d^b	k^b	g^b	f^b	v^b	T^b	D^b	s^b	z^b	S^b	C^b	J^b	w^b	y^b	h^b	m^b	n^b	l^b	r^b	9
an	ɑn	early-8	pan	ban	tan	dan	kan	gan	fan	van	Tan	Dan	san	zan	San	Can	Jan	wan	yan	han	man	nan	lan	ran	9
ed	eɪd	early-8	ped	bed	ted	ded	ked	ged	fed	ved	Ted	Ded	sed	zed	Sed	Ced	Jed	wed	yed	hed	med	ned	led	red	9
op	oʊp	early-8	pop	bop	top	dop	kop	gop	fop	vop	Top	Dop	sop	zop	Sop	Cop	Jop	wop	yop	hop	mop	nop	lop	rop	9
Yd	aɪd	early-8	pYd	bYd	tYd	dYd	kYd	gYd	fYd	vYd	TYd	DYd	sYd	zYd	SYd	CYd	JYd	wYd	yYd	hYd	mYd	nYd	lYd	rYd	9
Id	ɪd	early-8	pId	bId	tId	dId	kId	gId	fId	vId	TId	DId	sId	zId	SId	CId	JId	wId	yId	hId	mId	nId	lId	rId	8
Im	ɪm	early-8	pIm	bIm	tIm	dIm	kIm	gIm	fIm	vIm	TIm	DIm	sIm	zIm	SIm	CIm	JIm	wIm	yIm	hIm	mIm	nIm	lIm	rIm	8
om	oʊm	early-8	pom	bom	tom	dom	kom	gom	fom	vom	Tom	Dom	som	zom	Som	Com	Jom	wom	yom	hom	mom	nom	lom	rom	8
ud	ud	early-8	pud	bud	tud	dud	kud	gud	fud	vud	Tud	Dud	sud	zud	Sud	Cud	Jud	wud	yud	hud	mud	nud	lud	rud	8
um	um	early-8	pum	bum	tum	dum	kum	gum	fum	vum	Tum	Dum	sum	zum	Sum	Cum	Jum	wum	yum	hum	mum	num	lum	rum	8
@b	æb	early-8	p@b	b@b	t@b	d@b	k@b	g@b	f@b	v@b	T@b	D@b	s@b	z@b	S@b	C@b	J@b	w@b	y@b	h@b	m@b	n@b	l@b	r@b	7
ep	eɪp	early-8	pep	bep	tep	dep	kep	gep	fep	vep	Tep	Dep	sep	zep	Sep	Cep	Jep	wep	yep	hep	mep	nep	lep	rep	7
up	up	early-8	pup	bup	tup	dup	kup	gup	fup	vup	Tup	Dup	sup	zup	Sup	Cup	Jup	wup	yup	hup	mup	nup	lup	rup	7
^d	ʌd	early-8	p^d	b^d	t^d	d^d	k^d	g^d	f^d	v^d	T^d	D^d	s^d	z^d	S^d	C^d	J^d	w^d	y^d	h^d	m^d	n^d	l^d	r^d	6
am	ɑm	early-8	pam	bam	tam	dam	kam	gam	fam	vam	Tam	Dam	sam	zam	Sam	Cam	Jam	wam	yam	ham	mam	nam	lam	ram	6
cn	ɔn	early-8	pcn	bcn	tcn	dcn	kcn	gcn	fcn	vcn	Tcn	Dcn	scn	zcn	Scn	Ccn	Jcn	wcn	ycn	hcn	mcn	ncn	lcn	rcn	6
im	im	early-8	pim	bim	tim	dim	kim	gim	fim	vim	Tim	Dim	sim	zim	Sim	Cim	Jim	wim	yim	him	mim	nim	lim	rim	6
Ym	aɪm	early-8	pYm	bYm	tYm	dYm	kYm	gYm	fYm	vYm	TYm	DYm	sYm	zYm	SYm	CYm	JYm	wYm	yYm	hYm	mYm	nYm	lYm	rYm	6
Ib	ɪb	early-8	pIb	bIb	tIb	dIb	kIb	gIb	fIb	vIb	TIb	DIb	sIb	zIb	SIb	CIb	JIb	wIb	yIb	hIb	mIb	nIb	lIb	rIb	5
Ud	ʊd	early-8	pUd	bUd	tUd	dUd	kUd	gUd	fUd	vUd	TUd	DUd	sUd	zUd	SUd	CUd	JUd	wUd	yUd	hUd	mUd	nUd	lUd	rUd	5
^p	ʌp	early-8	p^p	b^p	t^p	d^p	k^p	g^p	f^p	v^p	T^p	D^p	s^p	z^p	S^p	C^p	J^p	w^p	y^p	h^p	m^p	n^p	l^p	r^p	4
Eb	ɛb	early-8	pEb	bEb	tEb	dEb	kEb	gEb	fEb	vEb	TEb	DEb	sEb	zEb	SEb	CEb	JEb	wEb	yEb	hEb	mEb	nEb	lEb	rEb	4
Wn	aʊn	early-8	pWn	bWn	tWn	dWn	kWn	gWn	fWn	vWn	TWn	DWn	sWn	zWn	SWn	CWn	JWn	wWn	yWn	hWn	mWn	nWn	lWn	rWn	4
Yp	aɪp	early-8	pYp	bYp	tYp	dYp	kYp	gYp	fYp	vYp	TYp	DYp	sYp	zYp	SYp	CYp	JYp	wYp	yYp	hYp	mYp	nYp	lYp	rYp	4
Em	ɛm	early-8	pEm	bEm	tEm	dEm	kEm	gEm	fEm	vEm	TEm	DEm	sEm	zEm	SEm	CEm	JEm	wEm	yEm	hEm	mEm	nEm	lEm	rEm	3
On	ɔɪn	early-8	pOn	bOn	tOn	dOn	kOn	gOn	fOn	vOn	TOn	DOn	sOn	zOn	SOn	COn	JOn	wOn	yOn	hOn	mOn	nOn	lOn	rOn	3
Ep	ɛp	early-8	pEp	bEp	tEp	dEp	kEp	gEp	fEp	vEp	TEp	DEp	sEp	zEp	SEp	CEp	JEp	wEp	yEp	hEp	mEp	nEp	lEp	rEp	2
Wd	aʊd	early-8	pWd	bWd	tWd	dWd	kWd	gWd	fWd	vWd	TWd	DWd	sWd	zWd	SWd	CWd	JWd	wWd	yWd	hWd	mWd	nWd	lWd	rWd	2
ub	ub	early-8	pub	bub	tub	dub	kub	gub	fub	vub	Tub	Dub	sub	zub	Sub	Cub	Jub	wub	yub	hub	mub	nub	lub	rub	1
Ir	ɪr	late-8	pIr	bIr	tIr	dIr	kIr	gIr	fIr	vIr	TIr	DIr	sIr	zIr	SIr	CIr	JIr	wIr	yIr	hIr	mIr	nIr	lIr	rIr	18
el	eɪl	late-8	pel	bel	tel	del	kel	gel	fel	vel	Tel	Del	sel	zel	Sel	Cel	Jel	wel	yel	hel	mel	nel	lel	rel	16
Il	ɪl	late-8	pIl	bIl	tIl	dIl	kIl	gIl	fIl	vIl	TIl	DIl	sIl	zIl	SIl	CIl	JIl	wIl	yIl	hIl	mIl	nIl	lIl	rIl	16
or	oʊr	late-8	por	bor	tor	dor	kor	gor	for	vor	Tor	Dor	sor	zor	Sor	Cor	Jor	wor	yor	hor	mor	nor	lor	ror	16
ol	oʊl	late-8	pol	bol	tol	dol	kol	gol	fol	vol	Tol	Dol	sol	zol	Sol	Col	Jol	wol	yol	hol	mol	nol	lol	rol	15
Er	ɛr	late-8	pEr	bEr	tEr	dEr	kEr	gEr	fEr	vEr	TEr	DEr	sEr	zEr	SEr	CEr	JEr	wEr	yEr	hEr	mEr	nEr	lEr	rEr	14
il	il	late-8	pil	bil	til	dil	kil	gil	fil	vil	Til	Dil	sil	zil	Sil	Cil	Jil	wil	yil	hil	mil	nil	lil	ril	14
ar	ɑr	late-8	par	bar	tar	dar	kar	gar	far	var	Tar	Dar	sar	zar	Sar	Car	Jar	war	yar	har	mar	nar	lar	rar	11
cl	ɔl	late-8	pcl	bcl	tcl	dcl	kcl	gcl	fcl	vcl	Tcl	Dcl	scl	zcl	Scl	Ccl	Jcl	wcl	ycl	hcl	mcl	ncl	lcl	rcl	11
El	ɛl	late-8	pEl	bEl	tEl	dEl	kEl	gEl	fEl	vEl	TEl	DEl	sEl	zEl	SEl	CEl	JEl	wEl	yEl	hEl	mEl	nEl	lEl	rEl	11
Yl	aɪl	late-8	pYl	bYl	tYl	dYl	kYl	gYl	fYl	vYl	TYl	DYl	sYl	zYl	SYl	CYl	JYl	wYl	yYl	hYl	mYl	nYl	lYl	rYl	11
@S	æʃ	late-8	p@S	b@S	t@S	d@S	k@S	g@S	f@S	v@S	T@S	D@S	s@S	z@S	S@S	C@S	J@S	w@S	y@S	h@S	m@S	n@S	l@S	r@S	10
es	eɪs	late-8	pes	bes	tes	des	kes	ges	fes	ves	Tes	Des	ses	zes	Ses	Ces	Jes	wes	yes	hes	mes	nes	les	res	10
Yr	aɪr	late-8	pYr	bYr	tYr	dYr	kYr	gYr	fYr	vYr	TYr	DYr	sYr	zYr	SYr	CYr	JYr	wYr	yYr	hYr	mYr	nYr	lYr	rYr	10
ez	eɪz	late-8	pez	bez	tez	dez	kez	gez	fez	vez	Tez	Dez	sez	zez	Sez	Cez	Jez	wez	yez	hez	mez	nez	lez	rez	9
oz	oʊz	late-8	poz	boz	toz	doz	koz	goz	foz	voz	Toz	Doz	soz	zoz	Soz	Coz	Joz	woz	yoz	hoz	moz	noz	loz	roz	8
uz	uz	late-8	puz	buz	tuz	duz	kuz	guz	fuz	vuz	Tuz	Duz	suz	zuz	Suz	Cuz	Juz	wuz	yuz	huz	muz	nuz	luz	ruz	8
@s	æs	late-8	p@s	b@s	t@s	d@s	k@s	g@s	f@s	v@s	T@s	D@s	s@s	z@s	S@s	C@s	J@s	w@s	y@s	h@s	m@s	n@s	l@s	r@s	7
^l	ʌl	late-8	p^l	b^l	t^l	d^l	k^l	g^l	f^l	v^l	T^l	D^l	s^l	z^l	S^l	C^l	J^l	w^l	y^l	h^l	m^l	n^l	l^l	r^l	7
^s	ʌs	late-8	p^s	b^s	t^s	d^s	k^s	g^s	f^s	v^s	T^s	D^s	s^s	z^s	S^s	C^s	J^s	w^s	y^s	h^s	m^s	n^s	l^s	r^s	7
Es	ɛs	late-8	pEs	bEs	tEs	dEs	kEs	gEs	fEs	vEs	TEs	DEs	sEs	zEs	SEs	CEs	JEs	wEs	yEs	hEs	mEs	nEs	lEs	rEs	7
iz	iz	late-8	piz	biz	tiz	diz	kiz	giz	fiz	viz	Tiz	Diz	siz	ziz	Siz	Ciz	Jiz	wiz	yiz	hiz	miz	niz	liz	riz	7
ul	ul	late-8	pul	bul	tul	dul	kul	gul	ful	vul	Tul	Dul	sul	zul	Sul	Cul	Jul	wul	yul	hul	mul	nul	lul	rul	7
us	us	late-8	pus	bus	tus	dus	kus	gus	fus	vus	Tus	Dus	sus	zus	Sus	Cus	Jus	wus	yus	hus	mus	nus	lus	rus	7
Ys	aɪs	late-8	pYs	bYs	tYs	dYs	kYs	gYs	fYs	vYs	TYs	DYs	sYs	zYs	SYs	CYs	JYs	wYs	yYs	hYs	mYs	nYs	lYs	rYs	7
iT	iθ	late-8	piT	biT	tiT	diT	kiT	giT	fiT	viT	TiT	DiT	siT	ziT	SiT	CiT	JiT	wiT	yiT	hiT	miT	niT	liT	riT	6
Ol	ɔɪl	late-8	pOl	bOl	tOl	dOl	kOl	gOl	fOl	vOl	TOl	DOl	sOl	zOl	SOl	COl	JOl	wOl	yOl	hOl	mOl	nOl	lOl	rOl	6
Yz	aɪz	late-8	pYz	bYz	tYz	dYz	kYz	gYz	fYz	vYz	TYz	DYz	sYz	zYz	SYz	CYz	JYz	wYz	yYz	hYz	mYz	nYz	lYz	rYz	6
@T	æθ	late-8	p@T	b@T	t@T	d@T	k@T	g@T	f@T	v@T	T@T	D@T	s@T	z@T	S@T	C@T	J@T	w@T	y@T	h@T	m@T	n@T	l@T	r@T	5
^S	ʌʃ	late-8	p^S	b^S	t^S	d^S	k^S	g^S	f^S	v^S	T^S	D^S	s^S	z^S	S^S	C^S	J^S	w^S	y^S	h^S	m^S	n^S	l^S	r^S	5
cs	ɔs	late-8	pcs	bcs	tcs	dcs	kcs	gcs	fcs	vcs	Tcs	Dcs	scs	zcs	Scs	Ccs	Jcs	wcs	ycs	hcs	mcs	ncs	lcs	rcs	5
cz	ɔz	late-8	pcz	bcz	tcz	dcz	kcz	gcz	fcz	vcz	Tcz	Dcz	scz	zcz	Scz	Ccz	Jcz	wcz	ycz	hcz	mcz	ncz	lcz	rcz	5
is	is	late-8	pis	bis	tis	dis	kis	gis	fis	vis	Tis	Dis	sis	zis	Sis	Cis	Jis	wis	yis	his	mis	nis	lis	ris	5
Wl	aʊl	late-8	pWl	bWl	tWl	dWl	kWl	gWl	fWl	vWl	TWl	DWl	sWl	zWl	SWl	CWl	JWl	wWl	yWl	hWl	mWl	nWl	lWl	rWl	5
al	ɑl	late-8	pal	bal	tal	dal	kal	gal	fal	val	Tal	Dal	sal	zal	Sal	Cal	Jal	wal	yal	hal	mal	nal	lal	ral	4
aS	ɑʃ	late-8	paS	baS	taS	daS	kaS	gaS	faS	vaS	TaS	DaS	saS	zaS	SaS	CaS	JaS	waS	yaS	haS	maS	naS	laS	raS	4
Is	ɪs	late-8	pIs	bIs	tIs	dIs	kIs	gIs	fIs	vIs	TIs	DIs	sIs	zIs	SIs	CIs	JIs	wIs	yIs	hIs	mIs	nIs	lIs	rIs	4
IT	ɪθ	late-8	pIT	bIT	tIT	dIT	kIT	gIT	fIT	vIT	TIT	DIT	sIT	zIT	SIT	CIT	JIT	wIT	yIT	hIT	mIT	nIT	lIT	rIT	4
Ul	ʊl	late-8	pUl	bUl	tUl	dUl	kUl	gUl	fUl	vUl	TUl	DUl	sUl	zUl	SUl	CUl	JUl	wUl	yUl	hUl	mUl	nUl	lUl	rUl	4
uT	uθ	late-8	puT	buT	tuT	duT	kuT	guT	fuT	vuT	TuT	DuT	suT	zuT	SuT	CuT	JuT	wuT	yuT	huT	muT	nuT	luT	ruT	4
Ws	aʊs	late-8	pWs	bWs	tWs	dWs	kWs	gWs	fWs	vWs	TWs	DWs	sWs	zWs	SWs	CWs	JWs	wWs	yWs	hWs	mWs	nWs	lWs	rWs	4
@z	æz	late-8	p@z	b@z	t@z	d@z	k@z	g@z	f@z	v@z	T@z	D@z	s@z	z@z	S@z	C@z	J@z	w@z	y@z	h@z	m@z	n@z	l@z	r@z	3
^z	ʌz	late-8	p^z	b^z	t^z	d^z	k^z	g^z	f^z	v^z	T^z	D^z	s^z	z^z	S^z	C^z	J^z	w^z	y^z	h^z	m^z	n^z	l^z	r^z	3
IS	ɪʃ	late-8	pIS	bIS	tIS	dIS	kIS	gIS	fIS	vIS	TIS	DIS	sIS	zIS	SIS	CIS	JIS	wIS	yIS	hIS	mIS	nIS	lIS	rIS	3
Iz	ɪz	late-8	pIz	bIz	tIz	dIz	kIz	gIz	fIz	vIz	TIz	DIz	sIz	zIz	SIz	CIz	JIz	wIz	yIz	hIz	mIz	nIz	lIz	rIz	3
Os	ɔɪs	late-8	pOs	bOs	tOs	dOs	kOs	gOs	fOs	vOs	TOs	DOs	sOs	zOs	SOs	COs	JOs	wOs	yOs	hOs	mOs	nOs	lOs	rOs	3
Ur	ʊr	late-8	pUr	bUr	tUr	dUr	kUr	gUr	fUr	vUr	TUr	DUr	sUr	zUr	SUr	CUr	JUr	wUr	yUr	hUr	mUr	nUr	lUr	rUr	3
Wr	aʊr	late-8	pWr	bWr	tWr	dWr	kWr	gWr	fWr	vWr	TWr	DWr	sWr	zWr	SWr	CWr	JWr	wWr	yWr	hWr	mWr	nWr	lWr	rWr	3
@l	æl	late-8	p@l	b@l	t@l	d@l	k@l	g@l	f@l	v@l	T@l	D@l	s@l	z@l	S@l	C@l	J@l	w@l	y@l	h@l	m@l	n@l	l@l	r@l	2
as	ɑs	late-8	pas	bas	tas	das	kas	gas	fas	vas	Tas	Das	sas	zas	Sas	Cas	Jas	was	yas	has	mas	nas	las	ras	2
cr	ɔr	late-8	pcr	bcr	tcr	dcr	kcr	gcr	fcr	vcr	Tcr	Dcr	scr	zcr	Scr	Ccr	Jcr	wcr	ycr	hcr	mcr	ncr	lcr	rcr	2
ET	ɛθ	late-8	pET	bET	tET	dET	kET	gET	fET	vET	TET	DET	sET	zET	SET	CET	JET	wET	yET	hET	mET	nET	lET	rET	2
oT	oʊθ	late-8	poT	boT	toT	doT	koT	goT	foT	voT	ToT	DoT	soT	zoT	SoT	CoT	JoT	woT	yoT	hoT	moT	noT	loT	roT	2
Oz	ɔɪz	late-8	pOz	bOz	tOz	dOz	kOz	gOz	fOz	vOz	TOz	DOz	sOz	zOz	SOz	COz	JOz	wOz	yOz	hOz	mOz	nOz	lOz	rOz	2
US	ʊʃ	late-8	pUS	bUS	tUS	dUS	kUS	gUS	fUS	vUS	TUS	DUS	sUS	zUS	SUS	CUS	JUS	wUS	yUS	hUS	mUS	nUS	lUS	rUS	2
WT	aʊθ	late-8	pWT	bWT	tWT	dWT	kWT	gWT	fWT	vWT	TWT	DWT	sWT	zWT	SWT	CWT	JWT	wWT	yWT	hWT	mWT	nWT	lWT	rWT	2
cS	ɔʃ	late-8	pcS	bcS	tcS	dcS	kcS	gcS	fcS	vcS	TcS	DcS	scS	zcS	ScS	CcS	JcS	wcS	ycS	hcS	mcS	ncS	lcS	rcS	1
iS	iʃ	late-8	piS	biS	tiS	diS	kiS	giS	fiS	viS	TiS	DiS	siS	ziS	SiS	CiS	JiS	wiS	yiS	hiS	miS	niS	liS	riS	1
os	oʊs	late-8	pos	bos	tos	dos	kos	gos	fos	vos	Tos	Dos	sos	zos	Sos	Cos	Jos	wos	yos	hos	mos	nos	los	ros	1
at	ɑt	mid-8	pat	bat	tat	dat	kat	gat	fat	vat	Tat	Dat	sat	zat	Sat	Cat	Jat	wat	yat	hat	mat	nat	lat	rat	15
@g	æg	mid-8	p@g	b@g	t@g	d@g	k@g	g@g	f@g	v@g	T@g	D@g	s@g	z@g	S@g	C@g	J@g	w@g	y@g	h@g	m@g	n@g	l@g	r@g	13
@k	æk	mid-8	p@k	b@k	t@k	d@k	k@k	g@k	f@k	v@k	T@k	D@k	s@k	z@k	S@k	C@k	J@k	w@k	y@k	h@k	m@k	n@k	l@k	r@k	13
@t	æt	mid-8	p@t	b@t	t@t	d@t	k@t	g@t	f@t	v@t	T@t	D@t	s@t	z@t	S@t	C@t	J@t	w@t	y@t	h@t	m@t	n@t	l@t	r@t	13
Ik	ɪk	mid-8	pIk	bIk	tIk	dIk	kIk	gIk	fIk	vIk	TIk	DIk	sIk	zIk	SIk	CIk	JIk	wIk	yIk	hIk	mIk	nIk	lIk	rIk	13
It	ɪt	mid-8	pIt	bIt	tIt	dIt	kIt	gIt	fIt	vIt	TIt	DIt	sIt	zIt	SIt	CIt	JIt	wIt	yIt	hIt	mIt	nIt	lIt	rIt	13
ak	ɑk	mid-8	pak	bak	tak	dak	kak	gak	fak	vak	Tak	Dak	sak	zak	Sak	Cak	Jak	wak	yak	hak	mak	nak	lak	rak	12
et	eɪt	mid-8	pet	bet	tet	det	ket	get	fet	vet	Tet	Det	set	zet	Set	Cet	Jet	wet	yet	het	met	net	let	ret	12
Et	ɛt	mid-8	pEt	bEt	tEt	dEt	kEt	gEt	fEt	vEt	TEt	DEt	sEt	zEt	SEt	CEt	JEt	wEt	yEt	hEt	mEt	nEt	lEt	rEt	12
^g	ʌg	mid-8	p^g	b^g	t^g	d^g	k^g	g^g	f^g	v^g	T^g	D^g	s^g	z^g	S^g	C^g	J^g	w^g	y^g	h^g	m^g	n^g	l^g	r^g	11
^t	ʌt	mid-8	p^t	b^t	t^t	d^t	k^t	g^t	f^t	v^t	T^t	D^t	s^t	z^t	S^t	C^t	J^t	w^t	y^t	h^t	m^t	n^t	l^t	r^t	11
ek	eɪk	mid-8	pek	bek	tek	dek	kek	gek	fek	vek	Tek	Dek	sek	zek	Sek	Cek	Jek	wek	yek	hek	mek	nek	lek	rek	11
ev	eɪv	mid-8	pev	bev	tev	dev	kev	gev	fev	vev	Tev	Dev	sev	zev	Sev	Cev	Jev	wev	yev	hev	mev	nev	lev	rev	11
ut	ut	mid-8	put	but	tut	dut	kut	gut	fut	vut	Tut	Dut	sut	zut	Sut	Cut	Jut	wut	yut	hut	mut	nut	lut	rut	11
Yt	aɪt	mid-8	pYt	bYt	tYt	dYt	kYt	gYt	fYt	vYt	TYt	DYt	sYt	zYt	SYt	CYt	JYt	wYt	yYt	hYt	mYt	nYt	lYt	rYt	11
^k	ʌk	mid-8	p^k	b^k	t^k	d^k	k^k	g^k	f^k	v^k	T^k	D^k	s^k	z^k	S^k	C^k	J^k	w^k	y^k	h^k	m^k	n^k	l^k	r^k	10
IG	ɪŋ	mid-8	pIG	bIG	tIG	dIG	kIG	gIG	fIG	vIG	TIG	DIG	sIG	zIG	SIG	CIG	JIG	wIG	yIG	hIG	mIG	nIG	lIG	rIG	10
ik	ik	mid-8	pik	bik	tik	dik	kik	gik	fik	vik	Tik	Dik	sik	zik	Sik	Cik	Jik	wik	yik	hik	mik	nik	lik	rik	10
it	it	mid-8	pit	bit	tit	dit	kit	git	fit	vit	Tit	Dit	sit	zit	Sit	Cit	Jit	wit	yit	hit	mit	nit	lit	rit	10
ot	oʊt	mid-8	pot	bot	tot	dot	kot	got	fot	vot	Tot	Dot	sot	zot	Sot	Cot	Jot	wot	yot	hot	mot	not	lot	rot	10
ct	ɔt	mid-8	pct	bct	tct	dct	kct	gct	fct	vct	Tct	Dct	sct	zct	Sct	Cct	Jct	wct	yct	hct	mct	nct	lct	rct	9
ok	oʊk	mid-8	pok	bok	tok	dok	kok	gok	fok	vok	Tok	Dok	sok	zok	Sok	Cok	Jok	wok	yok	hok	mok	nok	lok	rok	9
@G	æŋ	mid-8	p@G	b@G	t@G	d@G	k@G	g@G	f@G	v@G	T@G	D@G	s@G	z@G	S@G	C@G	J@G	w@G	y@G	h@G	m@G	n@G	l@G	r@G	8
^f	ʌf	mid-8	p^f	b^f	t^f	d^f	k^f	g^f	f^f	v^f	T^f	D^f	s^f	z^f	S^f	C^f	J^f	w^f	y^f	h^f	m^f	n^f	l^f	r^f	8
^G	ʌŋ	mid-8	p^G	b^G	t^G	d^G	k^G	g^G	f^G	v^G	T^G	D^G	s^G	z^G	S^G	C^G	J^G	w^G	y^G	h^G	m^G	n^G	l^G	r^G	8
Ek	ɛk	mid-8	pEk	bEk	tEk	dEk	kEk	gEk	fEk	vEk	TEk	DEk	sEk	zEk	SEk	CEk	JEk	wEk	yEk	hEk	mEk	nEk	lEk	rEk	8
Ig	ɪg	mid-8	pIg	bIg	tIg	dIg	kIg	gIg	fIg	vIg	TIg	DIg	sIg	zIg	SIg	CIg	JIg	wIg	yIg	hIg	mIg	nIg	lIg	rIg	8
Uk	ʊk	mid-8	pUk	bUk	tUk	dUk	kUk	gUk	fUk	vUk	TUk	DUk	sUk	zUk	SUk	CUk	JUk	wUk	yUk	hUk	mUk	nUk	lUk	rUk	8
Wt	aʊt	mid-8	pWt	bWt	tWt	dWt	kWt	gWt	fWt	vWt	TWt	DWt	sWt	zWt	SWt	CWt	JWt	wWt	yWt	hWt	mWt	nWt	lWt	rWt	8
@C	æʧ	mid-8	p@C	b@C	t@C	d@C	k@C	g@C	f@C	v@C	T@C	D@C	s@C	z@C	S@C	C@C	J@C	w@C	y@C	h@C	m@C	n@C	l@C	r@C	7
cG	ɔŋ	mid-8	pcG	bcG	tcG	dcG	kcG	gcG	fcG	vcG	TcG	DcG	scG	zcG	ScG	CcG	JcG	wcG	ycG	hcG	mcG	ncG	lcG	rcG	7
ck	ɔk	mid-8	pck	bck	tck	dck	kck	gck	fck	vck	Tck	Dck	sck	zck	Sck	Cck	Jck	wck	yck	hck	mck	nck	lck	rck	7
IC	ɪʧ	mid-8	pIC	bIC	tIC	dIC	kIC	gIC	fIC	vIC	TIC	DIC	sIC	zIC	SIC	CIC	JIC	wIC	yIC	hIC	mIC	nIC	lIC	rIC	7
if	if	mid-8	pif	bif	tif	dif	kif	gif	fif	vif	Tif	Dif	sif	zif	Sif	Cif	Jif	wif	yif	hif	mif	nif	lif	rif	7
Yk	aɪk	mid-8	pYk	bYk	tYk	dYk	kYk	gYk	fYk	vYk	TYk	DYk	sYk	zYk	SYk	CYk	JYk	wYk	yYk	hYk	mYk	nYk	lYk	rYk	7
Yv	aɪv	mid-8	pYv	bYv	tYv	dYv	kYv	gYv	fYv	vYv	TYv	DYv	sYv	zYv	SYv	CYv	JYv	wYv	yYv	hYv	mYv	nYv	lYv	rYv	7
eJ	eɪʤ	mid-8	peJ	beJ	teJ	deJ	keJ	geJ	feJ	veJ	TeJ	DeJ	seJ	zeJ	SeJ	CeJ	JeJ	weJ	yeJ	heJ	meJ	neJ	leJ	reJ	6
iv	iv	mid-8	piv	biv	tiv	div	kiv	giv	fiv	viv	Tiv	Div	siv	ziv	Siv	Civ	Jiv	wiv	yiv	hiv	miv	niv	liv	riv	6
ov	oʊv	mid-8	pov	bov	tov	dov	kov	gov	fov	vov	Tov	Dov	sov	zov	Sov	Cov	Jov	wov	yov	hov	mov	nov	lov	rov	6
@f	æf	mid-8	p@f	b@f	t@f	d@f	k@f	g@f	f@f	v@f	T@f	D@f	s@f	z@f	S@f	C@f	J@f	w@f	y@f	h@f	m@f	n@f	l@f	r@f	5
^C	ʌʧ	mid-8	p^C	b^C	t^C	d^C	k^C	g^C	f^C	v^C	T^C	D^C	s^C	z^C	S^C	C^C	J^C	w^C	y^C	h^C	m^C	n^C	l^C	r^C	5
ag	ɑg	mid-8	pag	bag	tag	dag	kag	gag	fag	vag	Tag	Dag	sag	zag	Sag	Cag	Jag	wag	yag	hag	mag	nag	lag	rag	5
cg	ɔg	mid-8	pcg	bcg	tcg	dcg	kcg	gcg	fcg	vcg	Tcg	Dcg	scg	zcg	Scg	Ccg	Jcg	wcg	ycg	hcg	mcg	ncg	lcg	rcg	5
EJ	ɛʤ	mid-8	pEJ	bEJ	tEJ	dEJ	kEJ	gEJ	fEJ	vEJ	TEJ	DEJ	sEJ	zEJ	SEJ	CEJ	JEJ	wEJ	yEJ	hEJ	mEJ	nEJ	lEJ	rEJ	5
iC	iʧ	mid-8	piC	biC	tiC	diC	kiC	giC	fiC	viC	TiC	DiC	siC	ziC	SiC	CiC	JiC	wiC	yiC	hiC	miC	niC	liC	riC	5
Yf	aɪf	mid-8	pYf	bYf	tYf	dYf	kYf	gYf	fYf	vYf	TYf	DYf	sYf	zYf	SYf	CYf	JYf	wYf	yYf	hYf	mYf	nYf	lYf	rYf	5
^J	ʌʤ	mid-8	p^J	b^J	t^J	d^J	k^J	g^J	f^J	v^J	T^J	D^J	s^J	z^J	S^J	C^J	J^J	w^J	y^J	h^J	m^J	n^J	l^J	r^J	4
EC	ɛʧ	mid-8	pEC	bEC	tEC	dEC	kEC	gEC	fEC	vEC	TEC	DEC	sEC	zEC	SEC	CEC	JEC	wEC	yEC	hEC	mEC	nEC	lEC	rEC	4
Ef	ɛf	mid-8	pEf	bEf	tEf	dEf	kEf	gEf	fEf	vEf	TEf	DEf	sEf	zEf	SEf	CEf	JEf	wEf	yEf	hEf	mEf	nEf	lEf	rEf	4
Eg	ɛg	mid-8	pEg	bEg	tEg	dEg	kEg	gEg	fEg	vEg	TEg	DEg	sEg	zEg	SEg	CEg	JEg	wEg	yEg	hEg	mEg	nEg	lEg	rEg	4
Iv	ɪv	mid-8	pIv	bIv	tIv	dIv	kIv	gIv	fIv	vIv	TIv	DIv	sIv	zIv	SIv	CIv	JIv	wIv	yIv	hIv	mIv	nIv	lIv	rIv	4
@v	æv	mid-8	p@v	b@v	t@v	d@v	k@v	g@v	f@v	v@v	T@v	D@v	s@v	z@v	S@v	C@v	J@v	w@v	y@v	h@v	m@v	n@v	l@v	r@v	3
ef	eɪf	mid-8	pef	bef	tef	def	kef	gef	fef	vef	Tef	Def	sef	zef	Sef	Cef	Jef	wef	yef	hef	mef	nef	lef	ref	3
oC	oʊʧ	mid-8	poC	boC	toC	doC	koC	goC	foC	voC	ToC	DoC	soC	zoC	SoC	CoC	JoC	woC	yoC	hoC	moC	noC	loC	roC	3
uf	uf	mid-8	puf	buf	tuf	duf	kuf	guf	fuf	vuf	Tuf	Duf	suf	zuf	Suf	Cuf	Juf	wuf	yuf	huf	muf	nuf	luf	ruf	3
uk	uk	mid-8	puk	buk	tuk	duk	kuk	guk	fuk	vuk	Tuk	Duk	suk	zuk	Suk	Cuk	Juk	wuk	yuk	huk	muk	nuk	luk	ruk	3
Ut	ʊt	mid-8	pUt	bUt	tUt	dUt	kUt	gUt	fUt	vUt	TUt	DUt	sUt	zUt	SUt	CUt	JUt	wUt	yUt	hUt	mUt	nUt	lUt	rUt	3
WC	aʊʧ	mid-8	pWC	bWC	tWC	dWC	kWC	gWC	fWC	vWC	TWC	DWC	sWC	zWC	SWC	CWC	JWC	wWC	yWC	hWC	mWC	nWC	lWC	rWC	3
@J	æʤ	mid-8	p@J	b@J	t@J	d@J	k@J	g@J	f@J	v@J	T@J	D@J	s@J	z@J	S@J	C@J	J@J	w@J	y@J	h@J	m@J	n@J	l@J	r@J	2
^v	ʌv	mid-8	p^v	b^v	t^v	d^v	k^v	g^v	f^v	v^v	T^v	D^v	s^v	z^v	S^v	C^v	J^v	w^v	y^v	h^v	m^v	n^v	l^v	r^v	2
aJ	ɑʤ	mid-8	paJ	baJ	taJ	daJ	kaJ	gaJ	faJ	vaJ	TaJ	DaJ	saJ	zaJ	SaJ	CaJ	JaJ	waJ	yaJ	haJ	maJ	naJ	laJ	raJ	2
cC	ɔʧ	mid-8	pcC	bcC	tcC	dcC	kcC	gcC	fcC	vcC	TcC	DcC	scC	zcC	ScC	CcC	JcC	wcC	ycC	hcC	mcC	ncC	lcC	rcC	2
If	ɪf	mid-8	pIf	bIf	tIf	dIf	kIf	gIf	fIf	vIf	TIf	DIf	sIf	zIf	SIf	CIf	JIf	wIf	yIf	hIf	mIf	nIf	lIf	rIf	2
UC	ʊʧ	mid-8	pUC	bUC	tUC	dUC	kUC	gUC	fUC	vUC	TUC	DUC	sUC	zUC	SUC	CUC	JUC	wUC	yUC	hUC	mUC	nUC	lUC	rUC	2
uv	uv	mid-8	puv	buv	tuv	duv	kuv	guv	fuv	vuv	Tuv	Duv	suv	zuv	Suv	Cuv	Juv	wuv	yuv	huv	muv	nuv	luv	ruv	2
cf	ɔf	mid-8	pcf	bcf	tcf	dcf	kcf	gcf	fcf	vcf	Tcf	Dcf	scf	zcf	Scf	Ccf	Jcf	wcf	ycf	hcf	mcf	ncf	lcf	rcf	1
ig	ig	mid-8	pig	big	tig	dig	kig	gig	fig	vig	Tig	Dig	sig	zig	Sig	Cig	Jig	wig	yig	hig	mig	nig	lig	rig	1
of	oʊf	mid-8	pof	bof	tof	dof	kof	gof	fof	vof	Tof	Dof	sof	zof	Sof	Cof	Jof	wof	yof	hof	mof	nof	lof	rof	1
WJ	aʊʤ	mid-8	pWJ	bWJ	tWJ	dWJ	kWJ	gWJ	fWJ	vWJ	TWJ	DWJ	sWJ	zWJ	SWJ	CWJ	JWJ	wWJ	yWJ	hWJ	mWJ	nWJ	lWJ	rWJ	1
eC	eɪʧ	mid-8	peC	beC	teC	deC	keC	geC	feC	veC	TeC	DeC	seC	zeC	SeC	CeC	JeC	weC	yeC	heC	meC	neC	leC	reC	0
